# Supplementary material
Source: PubMed Central journal article supplement (PMC7515248)
Supplement: JB.00233-20-s0001.pdf [file JB.00233-20-s0001.pdf]

SUPPLEMENTAL MATERIAL

**Diverse energy-conserving pathways in *Clostridium difficile*:  
Growth in the absence of amino acid Stickland acceptors  
and the role of the Wood-Ljungdahl Pathway**

Simonida Gencic and David A. Grahame

Fig.S1

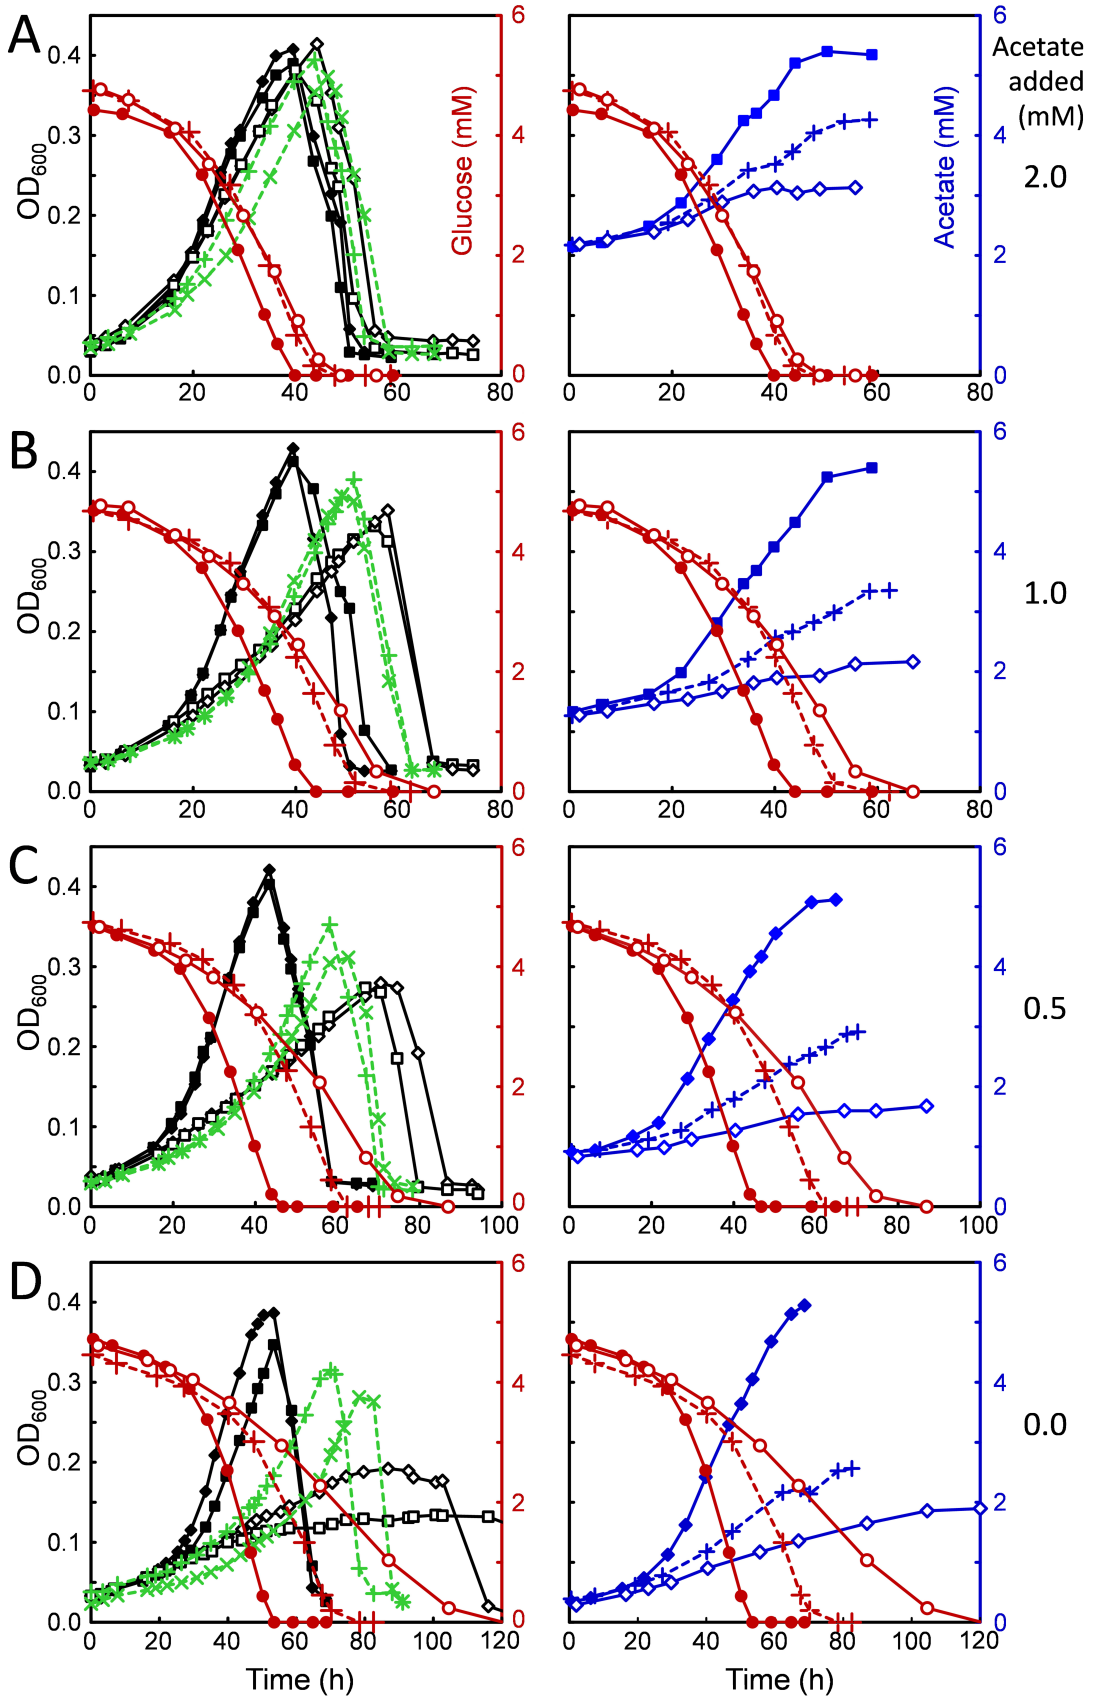

### Figure S1. Complementation of the *C. difficile* $\DeltaacsB$ mutant

Wild-type,  $\DeltaacsB$  mutant and the complemented  $\DeltaacsB$  mutant are compared for growth, glucose consumption and acetate production in glucose-only (Glc only) medium under acetate-limiting conditions. Glc only medium contained decreasing amounts of sodium acetate (**A-D**, 2.0, 1.0, 0.5 and 0 mM). Panels on the left show growth OD<sub>600</sub> of WT (closed black symbols),  $\DeltaacsB$  mutant (open black symbols), and the complemented  $\DeltaacsB$  mutant (+ green symbols, dashed lines), and glucose consumption (red corresponding symbols). Panels at the right show acetate production, WT (closed blue symbols),  $\DeltaacsB$  mutant (open blue symbols), and the complemented  $\DeltaacsB$  mutant (+ blue symbols, dashed lines) from the same growths and the corresponding glucose consumption curves (in red) for comparison.

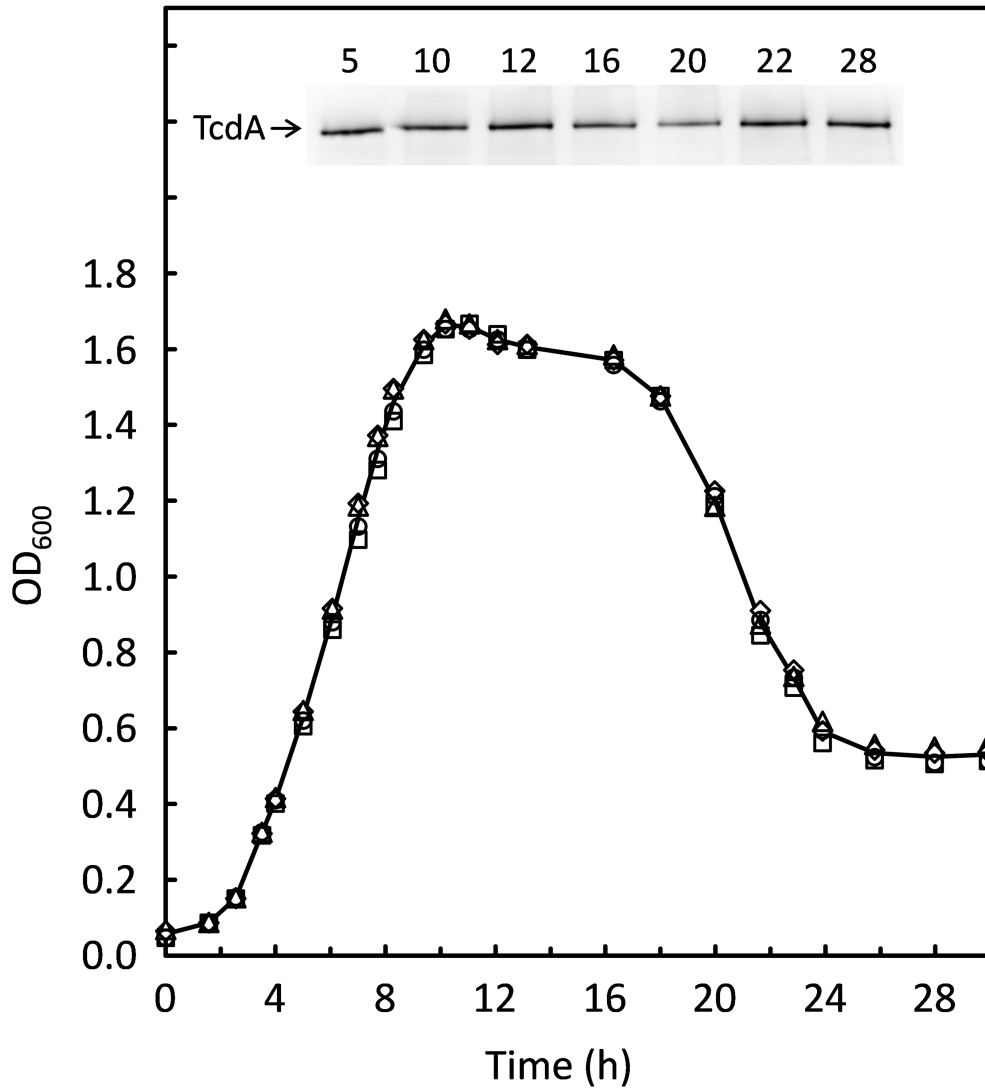

**Figure S2. TcdA toxin levels in *C. difficile* during growth in BHIS medium**

Growth was followed on four BHIS cultures as described under Materials and Methods. Inset; Western blot of an 8% acrylamide SDS-PAGE gel with samples removed from cultures at the times indicated (hours) using anti-TcdA as primary antibody.

**TABLE S1** Evolution of H<sub>2</sub> during growth in BHIS

| <i>Time (hr)</i> | <i>BHIS-1 H<sub>2</sub> (%)</i> | <i>BHIS-2 H<sub>2</sub> (%)</i> |
|------------------|---------------------------------|---------------------------------|
| 2.3              | 0.42                            | 0.56                            |
| 4.6              | 2.06                            | 2.04                            |
| 6.8              | 3.84                            | 3.99                            |
| 9.2              | 7.12                            | 8.11                            |
| 21.4             | 9.46                            | 10.97                           |
| 25.9             | 9.96                            | 11.70                           |

Duplicate 10 ml BHIS day cultures (BHIS-1 and BHIS-2) were prepared as described under Materials and Methods, and monitored for growth by OD<sub>600</sub> and for H<sub>2</sub> evolution by gas-tight, valve-equipped, syringe sampling of the headspace (17 ml total). Hydrogen in aliquots of the gas phase (0.2 ml) was quantified by GC using a 1.3 m molecular sieve 13 X column (isothermal at 40 °C) with N<sub>2</sub> as carrier gas, producing negative peaks by TCD detection. The cultures were grown at 37 °C and periodically shaken. The maximum amount of H<sub>2</sub> found was 10-12% of the gas phase by volume. Thus, the 17 ml headspace contained approximately 7.6 to 9.1 μmol H<sub>2</sub> evolved per ml of culture, which, in relation to other substrates and products (Table S2) represents a substantial number of reducing equivalents disposed of as H<sub>2</sub>.

**TABLE S3** Bacterial strains and plasmids

| Strain or plasmid              | Relevant features                                                                                                                                 | Source        |
|--------------------------------|---------------------------------------------------------------------------------------------------------------------------------------------------|---------------|
| <i>E. coli</i> strains         |                                                                                                                                                   |               |
| DH5 $\alpha$                   |                                                                                                                                                   | Invitrogen    |
| TOP10                          |                                                                                                                                                   | Invitrogen    |
| NEB10-beta                     |                                                                                                                                                   | Biolabs       |
| NM522                          |                                                                                                                                                   | Promega       |
| NM522(DE3)                     |                                                                                                                                                   | This study    |
| XL1-Blue                       |                                                                                                                                                   | Stratagene    |
| S17-1                          |                                                                                                                                                   | ATCC 47055    |
| SG-Ec2270                      | S17-1 with pSG1217                                                                                                                                | This study    |
| SG-Ec2280                      | S17-1 with pMTL84151:: <i>acsB</i>                                                                                                                | This study    |
| <i>C. difficile</i> strains    |                                                                                                                                                   |               |
| CD630                          | Genome reference strain                                                                                                                           | ATCC BAA-1382 |
| CD630 $\Delta$ <i>acsB</i>     | CD630 with in-frame deletion in the acetyl CoA synthase <i>acsB</i> gene                                                                          | This study    |
| SG-Cd113                       | CD630 $\Delta$ <i>acsB</i> with pMTL84151:: <i>acsB</i>                                                                                           | This study    |
| <i>Clostridium ljungdahlii</i> |                                                                                                                                                   | ATCC 55383    |
| Plasmids                       |                                                                                                                                                   |               |
| pCR-BluntII-TOPO               |                                                                                                                                                   | Invitrogen    |
| pMTL83151                      | <i>Clostridium</i> modular plasmid                                                                                                                | N. Minton     |
| pMTL83151:: <i>codA</i>        | pMTL83151 with modified <i>C. pasteurianum</i> <i>fdx</i> promoter fused to the <i>E. coli codA</i> gene and cloned into the BamHI and NcoI sites | This study    |
| pSG1217                        | pMTL83151:: <i>codA</i> with the <i>acsB</i> allele exchange cassette cloned into the PmeI site                                                   | This study    |
| pMTL84151                      | <i>Clostridium</i> modular plasmid used for complementation                                                                                       | N. Minton     |
| pMTL84151:: <i>acsB</i>        | Complementation plasmid, pMTL84151 with WLP promoter fused to the <i>acsB</i> and cloned into the BamHI and AatII sites                           | This study    |

**Table S4** Oligonucleotide sequences

| Name                      | Sequence (5'→3')                                           | Use                                          |
|---------------------------|------------------------------------------------------------|----------------------------------------------|
| <i>fdx-codA-BamHI-A-f</i> | 5' GTGCATGGATCCGATCGAGATAGTATATGATGCATATTC                 | <i>fdx-codA fusion</i>                       |
| <i>fdx-codA-B-r</i>       | 5' GTTTGTAAAGCGTTATTCGACACATTATGAAATACACCTCCTTAAAATTTAATC  |                                              |
| <i>fdx-codA-C-f</i>       | 5' GATTAATAATTTAAGGAGGTGATTTTCATAATGTGTCGAATAACGCTTTACAAAC |                                              |
| <i>fdx-codA-NcoI-D-r</i>  | 5' GGTCGACCATGGTCAACGTTTGTAAATCGATGGCTTC                   |                                              |
| <i>acsE-PmeI-A-f</i>      | 5' GTGCATGTTTAAACGATATAGCAGCTGAATACGAAGCAATGG              | <i>acsB</i> allele exchange                  |
| <i>acsB-5pdeI-B-r</i>     | 5' CTAATACTCCTTCAGAATCGTCAGCAGCTTGAGCCGCACCTAAAGC          |                                              |
| <i>acsB-3pdeI-C-f</i>     | 5' GCTTTAGGTGCGGCTCAAGCTGCTGACGATTCTGAAGGAGTATTAG          |                                              |
| <i>gcvH-PmeI-D-r</i>      | 5' GGTCGAGTTTAAACTAATCCAGCCTCGTATTCTTTATCAC                |                                              |
| <i>PL-AE-PmeI-f</i>       | 5' GACGGATTCACATTTGCCGTTTTGTAAACGAATTGCAGG                 | PCR of integrants and double cross-over recs |
| <i>PL-AE-PmeI-r</i>       | 5' AGATCCTTTGATCTTTTCTACGGGGTCTGACGCTCAGTGG                |                                              |
| <i>acsB-AE-1f</i>         | 5' CTGAGTTCAACAATGTTCTATAGCATTAGATACAGC                    |                                              |
| <i>acsB-AE-1r</i>         | 5' GATAAAAGGAAAGTATAGCTAAATTTGCGTGCACTC                    |                                              |
| <i>pro-BamHI-A-f</i>      | 5' GCATGGATCCGAAATAGGATAAATCGCTTGAAATAAATGAATTAAG          | native promoter- <i>acsB</i>                 |
| <i>pro-acsB-B-r</i>       | 5' GATTCATATTCCTATCCCCTTTTTTGTATTTTAAAATCCC                |                                              |
| <i>pro-acsB-C-f</i>       | 5' TCAAAAAAGGGGATAGGAATATGAATCTATATAATATAATCTTTACAGGGTCAG  |                                              |
| <i>acsB-AatII-D-f</i>     | 5' GCATGACGTCTTACATTACACTTTCCATAGCTAATGCTGG                |                                              |
